# Supplementary material for: Presence of Carotid Plaque Is Associated with Rapid Renal Function Decline in Patients with Type 2 Diabetes Mellitus and Normal Renal Function
Source: PubMed Central journal article supplement — Diabetes Metab J. 2019 Mar 12;43(6):840–53. doi: 10.4093/dmj.2018.0186 (PMC6943261; doi:10.4093/dmj.2018.0186), 2019-03-12
Supplement: dmj-43-840-s001.pdf [file dmj-43-840-s001.pdf]

**Supplementary Table 1.** Comparison of annual eGFR decline (%/year) according to various clinical parameters after adjusting for age

| Parameter                      | Annual eGFR decline, % | P value             |
|--------------------------------|------------------------|---------------------|
| Sex                            |                        |                     |
| Female                         | -2.1±2.5               | <0.001 <sup>a</sup> |
| Male                           | -0.4±2.4               |                     |
| Obesity/BMI, kg/m <sup>2</sup> |                        |                     |
| <25                            | -1.3±0.1               | 0.097               |
| ≥25                            | -1.0±0.1               |                     |
| Diabetes duration, yr          |                        |                     |
| <10                            | -1.0±0.1               | <0.001 <sup>a</sup> |
| ≥10                            | -1.8±0.2               |                     |
| HbA1c, %                       |                        |                     |
| <7                             | -0.7±0.1               | <0.001 <sup>a</sup> |
| ≥7                             | -1.4±0.1               |                     |
| Hypertension                   |                        |                     |
| No                             | -0.9±0.1               | 0.014 <sup>a</sup>  |
| Yes                            | -1.4±0.1               |                     |
| CVD                            |                        |                     |
| No                             | -1.1±0.1               | 0.269               |
| Yes                            | -1.4±0.3               |                     |
| Diabetic retinopathy           |                        |                     |
| No                             | -1.1±0.1               | 0.003 <sup>a</sup>  |
| Yes                            | -1.8±0.2               |                     |
| Carotid plaque                 |                        |                     |
| No                             | -0.9±0.1               | <0.001 <sup>a</sup> |
| Yes                            | -1.6±0.1               |                     |
| Albuminuria                    |                        |                     |
| No                             | -1.1±0.1               | 0.428               |
| Yes                            | -1.3±0.1               |                     |
| Use of ACEi/ARB                |                        |                     |
| No                             | -1.0±0.1               | 0.014 <sup>a</sup>  |
| Yes                            | -1.5±0.2               |                     |

Values are presented as mean ± standard error of mean.

eGFR, estimated glomerular filtration rate; BMI, body mass index; HbA1c, glycosylated hemoglobin; CVD, cardiovascular disease; ACEi, angiotensin-converting-enzyme inhibitor; ARB, angiotensin II-receptor blocker.

<sup>a</sup>Statistical significance.
