# Supplementary material for: Presence of Carotid Plaque Is Associated with Rapid Renal Function Decline in Patients with Type 2 Diabetes Mellitus and Normal Renal Function
Source: PubMed Central journal article supplement — Diabetes Metab J. 2019 Mar 12;43(6):840–53. doi: 10.4093/dmj.2018.0186 (PMC6943261; doi:10.4093/dmj.2018.0186), 2019-03-12
Supplement: dmj-43-840-s002.pdf [file dmj-43-840-s002.pdf]

**Supplementary Table 2.** Baseline characteristics of participants stratified by menopause status in female

| Characteristic                   | Female                              |                                      | P value             |
|----------------------------------|-------------------------------------|--------------------------------------|---------------------|
|                                  | Premenopause<br>(n=176, age <55 yr) | Postmenopause<br>(n=236, age ≥55 yr) |                     |
| Age, yr                          | 47.4±5.8                            | 62.5±5.3                             | <0.001 <sup>a</sup> |
| Diabetes duration, yr            | 4.9±5.1                             | 6.2±6.6                              | 0.032 <sup>a</sup>  |
| BMI, kg/m <sup>2</sup>           | 25.3±3.4                            | 25.8±3.5                             | 0.175               |
| WC, cm                           | 85.1±8.5                            | 87.7±8.5                             | 0.002 <sup>a</sup>  |
| SBP, mm Hg                       | 123.2±13.8                          | 127.4±15.3                           | 0.004 <sup>a</sup>  |
| DBP, mm Hg                       | 78.7±9.3                            | 77.5±9.3                             | 0.187               |
| Hypertension                     | 63 (36.2)                           | 136 (57.6)                           | <0.001 <sup>a</sup> |
| Dyslipidemia                     | 52 (30.4)                           | 89 (38.7)                            | 0.107               |
| CVD                              | 11 (6.3)                            | 35 (14.9)                            | 0.010 <sup>a</sup>  |
| Diabetic retinopathy             | 28 (19.6)                           | 38 (20.4)                            | 0.959               |
| Mean CIMT, mm                    | 0.8±0.2                             | 0.8±0.3                              | 0.314               |
| Carotid plaque (+)               | 32 (22.9)                           | 88 (44.4)                            | <0.001 <sup>a</sup> |
| HbA1c, %                         | 7.8±1.7                             | 7.6±1.7                              | 0.159               |
| Fasting glucose, mg/dL           | 144.1±37.7                          | 133.3±44.5                           | 0.012 <sup>a</sup>  |
| PP2 glucose, mg/dL               | 269.4±82.2                          | 266.9±87.5                           | 0.811               |
| HOMA-IR, units                   | 3.1±2.5                             | 3.1±4.4                              | 0.913               |
| hsCRP, mg/dL                     | 1.3±2.2                             | 2.8±14.1                             | 0.310               |
| TG, mg/dL                        | 151.6±97.5                          | 149.1±109.9                          | 0.822               |
| HDL-C, mg/dL                     | 51.2±12.6                           | 48.0±12.5                            | 0.015 <sup>a</sup>  |
| LDL-C, mg/dL                     | 111.2±35.4                          | 104.3±36.0                           | 0.070               |
| UACR, mg/g                       | 39.6±132.1                          | 36.7±198.4                           | 0.864               |
| eGFR, mL/min/1.73 m <sup>2</sup> | 101.9±14.8                          | 90.6±12.7                            | <0.001 <sup>a</sup> |
| Use of ACEi/ARB                  | 28 (15.9)                           | 65 (27.5)                            | 0.007 <sup>a</sup>  |
| GFR slope, %                     | -2.0±2.5                            | -2.2±2.5                             | 0.444               |
| Rapid decliners                  | 35 (19.9)                           | 68 (28.8)                            | 0.051               |

Values are presented as mean ± standard error of mean or number (%).

BMI, body mass index; WC, waist circumference; SBP, systolic blood pressure; DBP, diastolic blood pressure; CVD, cardiovascular disease; CIMT, carotid intima-media thickness; HbA1c, glycosylated hemoglobin; PP2, 2-hour post prandial; HOMA-IR, homeostasis model assessment of insulin resistance; hsCRP, high-sensitivity C-reactive protein; TG, triglyceride; HDL-C, high density lipoprotein cholesterol; LDL-C, low density lipoprotein cholesterol; UACR, urinary albumin creatinine ratio; eGFR, estimated glomerular filtration rate; ACEi, angiotensin-converting-enzyme inhibitor; ARB, angiotensin II-receptor blocker; GFR, glomerular filtration rate.

<sup>a</sup>Statistical significance.
